# Supplementary material for: Influences of Environmental Variables and Their Interactions on Chinese Farmland Soil Organic Carbon Density and Its Dynamics
Source: MDPI journal article supplement (doi:10.3390/land11020208), 2022-01-28
Supplement: s1 [file s1]

Table S1 Interaction detector results of SOCD.

|                  |               | Natural factors     |       |                     |              |                     |       | Human activities    |       |            |               |              |
|------------------|---------------|---------------------|-------|---------------------|--------------|---------------------|-------|---------------------|-------|------------|---------------|--------------|
|                  |               | elevation           | GD    | soil type           | clay content | MAT                 | MAP   | initial SOCD        | CS    | irrigation | fertilization | straw return |
| Natural factors  | elevation     | 0.117               |       |                     |              |                     |       |                     |       |            |               |              |
|                  | GD            | 0.585               | 0.312 |                     |              |                     |       |                     |       |            |               |              |
|                  | soil type     | <b><u>0.725</u></b> | 0.553 | 0.357               |              |                     |       |                     |       |            |               |              |
|                  | clay content  | 0.439               | 0.621 | <b><u>0.702</u></b> | 0.286        |                     |       |                     |       |            |               |              |
|                  | MAT           | 0.612               | 0.617 | <b><u>0.748</u></b> | 0.542        | 0.403               |       |                     |       |            |               |              |
|                  | MAP           | 0.519               | 0.430 | 0.544               | 0.549        | 0.492               | 0.264 |                     |       |            |               |              |
| Human activities | initial SOCD  | 0.397               | 0.518 | <b><u>0.602</u></b> | 0.475        | <b><u>0.630</u></b> | 0.536 | 0.290               |       |            |               |              |
|                  | CS            | 0.320               | 0.349 | 0.419               | 0.374        | <b><u>0.614</u></b> | 0.474 | <b><u>0.451</u></b> | 0.102 |            |               |              |
|                  | irrigation    | 0.198               | 0.438 | 0.386               | 0.465        | 0.585               | 0.465 | <b><u>0.358</u></b> | 0.130 | 0.049      |               |              |
|                  | fertilization | 0.193               | 0.398 | 0.445               | 0.372        | 0.472               | 0.337 | <b><u>0.366</u></b> | 0.183 | 0.107      | 0.047         |              |
|                  | straw return  | 0.138               | 0.350 | 0.375               | 0.304        | 0.449               | 0.284 | 0.347               | 0.129 | 0.086      | 0.067         | 0.014        |
|                  |               |                     |       |                     |              |                     |       |                     |       |            |               |              |

Note: GD: groundwater depth; MAT: mean annual temperature; MAP: mean annual precipitation; CS: cropping system. Bold and underlined numbers are dominant interaction effects of pairs of natural factors, human activities and natural and human factors on SOCD.

Table S2 Interaction detector results of SOCDSR.

|                  |               | Natural factors |                     |                     |              |                     |       |                     | Human activities    |            |               |              |
|------------------|---------------|-----------------|---------------------|---------------------|--------------|---------------------|-------|---------------------|---------------------|------------|---------------|--------------|
|                  |               | elevation       | GD                  | soil type           | clay content | MAT                 | MAP   | CD                  | CS                  | irrigation | fertilization | straw return |
| Natural factors  | elevation     | 0.007           |                     |                     |              |                     |       |                     |                     |            |               |              |
|                  | GD            | 0.218           | 0.182               |                     |              |                     |       |                     |                     |            |               |              |
|                  | soil type     | 0.281           | <b><u>0.304</u></b> | 0.084               |              |                     |       |                     |                     |            |               |              |
|                  | clay content  | 0.111           | 0.216               | 0.274               | 0.060        |                     |       |                     |                     |            |               |              |
|                  | MAT           | 0.232           | <b><u>0.279</u></b> | <b><u>0.287</u></b> | 0.248        | 0.164               |       |                     |                     |            |               |              |
|                  | MAP           | 0.127           | 0.247               | 0.203               | 0.215        | 0.182               | 0.078 |                     |                     |            |               |              |
| Human activities | CD            | 0.202           | 0.268               | 0.288               | 0.248        | 0.210               | 0.135 | 0.077               |                     |            |               |              |
|                  | CS            | 0.221           | 0.290               | 0.143               | 0.236        | <b><u>0.311</u></b> | 0.226 | <b><u>0.312</u></b> | 0.080               |            |               |              |
|                  | irrigation    | 0.062           | 0.210               | 0.115               | 0.113        | 0.231               | 0.148 | 0.122               | 0.097               | 0.019      |               |              |
|                  | fertilization | 0.175           | <b><u>0.424</u></b> | 0.331               | 0.254        | <b><u>0.389</u></b> | 0.278 | <b><u>0.293</u></b> | <b><u>0.374</u></b> | 0.198      | 0.142         |              |
|                  | straw return  | 0.029           | 0.214               | 0.109               | 0.083        | 0.201               | 0.105 | 0.129               | 0.117               | 0.035      | 0.181         | 0.001        |

Note: GD: groundwater depth; MAT: mean annual temperature; MAP: mean annual precipitation; CD: cropping duration; CS: cropping system. Bold and underlined numbers are dominant interaction effects of pairs of natural factors, human activities and natural and human factors on SOCDSR.
